# Supplementary material for: Les Communautés et l'Union européenne dans leurs relations extérieures
Source: Royal Society of Chemistry journal article supplement (doi:10.1039/c8ra04866e), 2003-01-01
Supplement: c8ra04866e1.pdf [file c8ra04866e1.pdf]

***Electronic Supplementary Information (ESI)***

**Eco-Friendly Synthesis of CuInS<sub>2</sub> and CuInS<sub>2</sub>@ZnS Quantum Dots and their Effect on Enzyme Activity of Lysozyme**

Irshad Ahmad Mir<sup>1</sup>, Kishan Das<sup>1</sup>, Tabasum Akhter<sup>2</sup>, Rahul Ranjan<sup>1</sup>, Rajan Patel<sup>3</sup>, and H B Bohidar<sup>1,4\*</sup>

<sup>1</sup>School of Physical Sciences, Jawaharlal Nehru University, New Delhi, India

<sup>2</sup>Department of Botany, University of Delhi, New Delhi, India

<sup>3</sup>Centre for Interdisciplinary Research in Basic Sciences, Jamia Millia Islamia, New Delhi, India

<sup>4</sup>Special Center for Nanosciences, Jawaharlal Nehru University, New Delhi, India

\*Corresponding author email: [bohi0700@mail.jnu.ac.in](mailto:bohi0700@mail.jnu.ac.in)

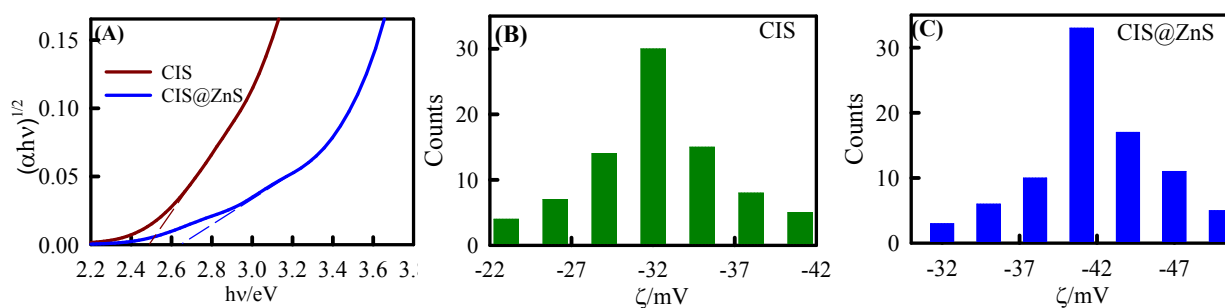

**Figure S1:** (A) Tauc band gap plot of CIS and CIS@ZnS QDs. Zeta potential of (B) CIS and (C) CIS@ZnS QDs. It is seen that the zeta potential value of CIS and CIS@ZnS is respectively -32 and -40mV.

**Table S1:** Elemental identification of QDs obtained from SEM-EDX.

| Feed molar Ratio (at same S and Zn) Cu: In: S: Zn | CIS         |      |      |    | CIS@ZnS     |      |      |      |
|---------------------------------------------------|-------------|------|------|----|-------------|------|------|------|
|                                                   | EDX weight% |      |      |    | EDX weight% |      |      |      |
|                                                   | Cu          | In   | S    | Zn | Cu          | In   | S    | Zn   |
| 0.1:0.4:0.5:1.0                                   | 5±0.4       | 25±1 | 68±3 | X* | 4±0.3       | 21±1 | 42±2 | 32±2 |

X\* neither used as precursor nor found from EDAX.

CIS QDs

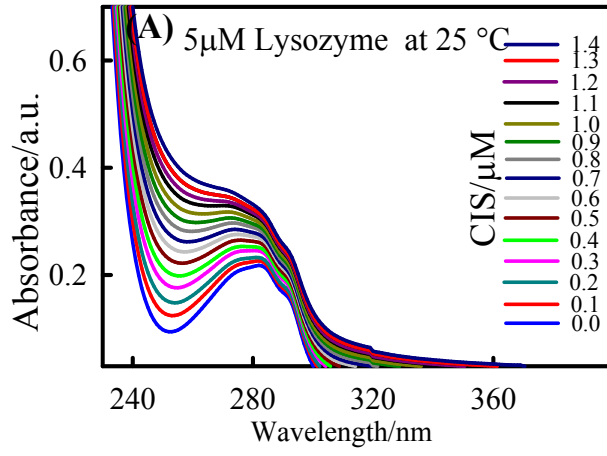

CIS@ZnS QDs

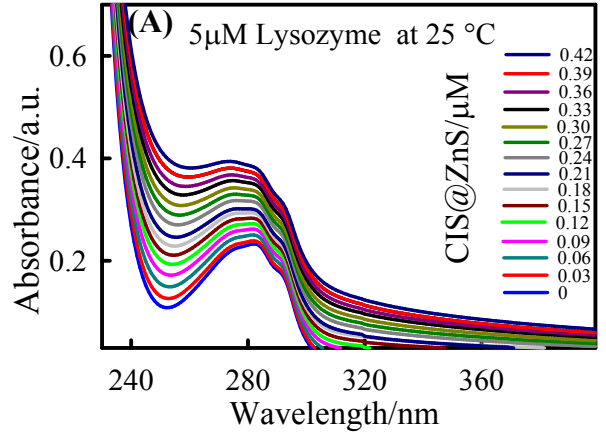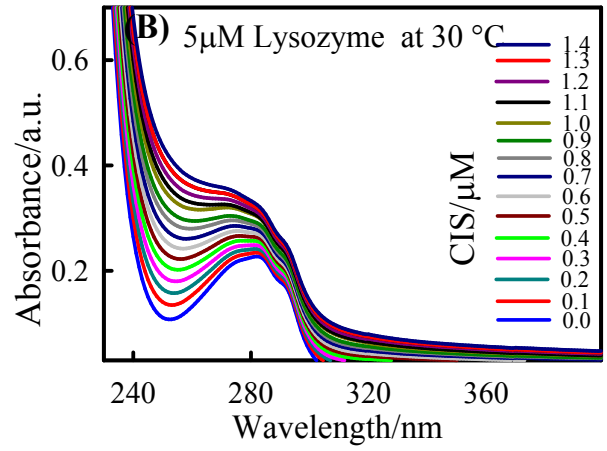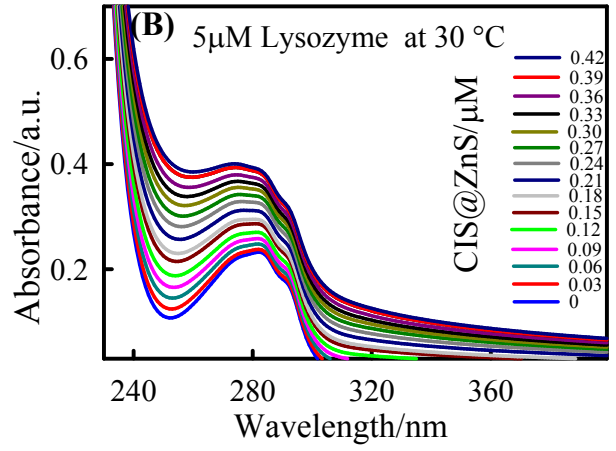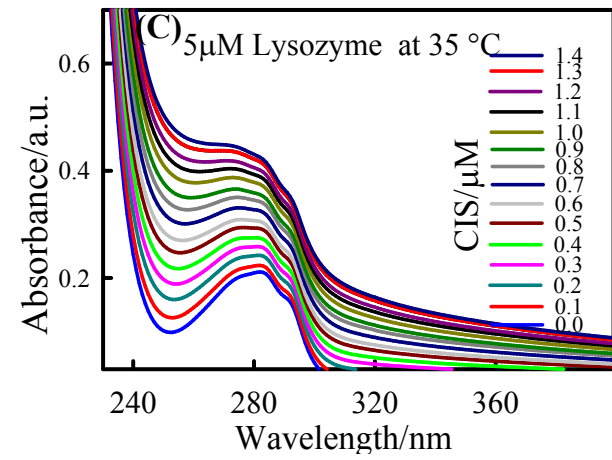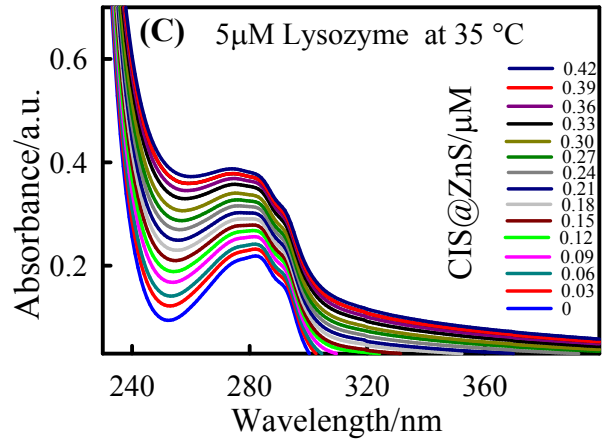

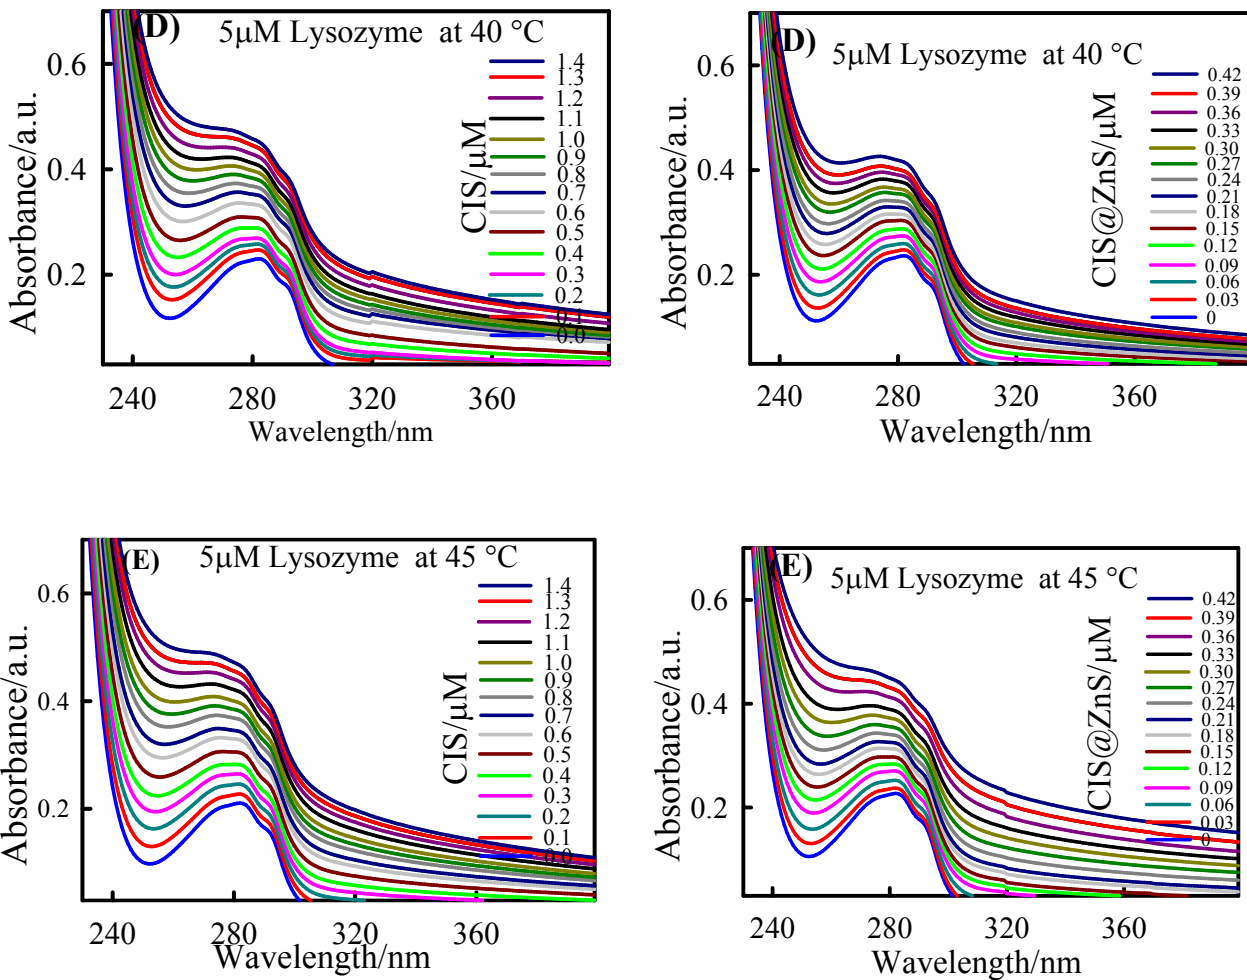

**Figure S2:** Absorption spectra of lysozyme (5 μM) in the presence of different concentrations of CIS (left side) and CIS@ZnS (right side) QD at different temperatures (A) 298, (B) 303, (C) 308, (D) 313 and (E) 318 K.

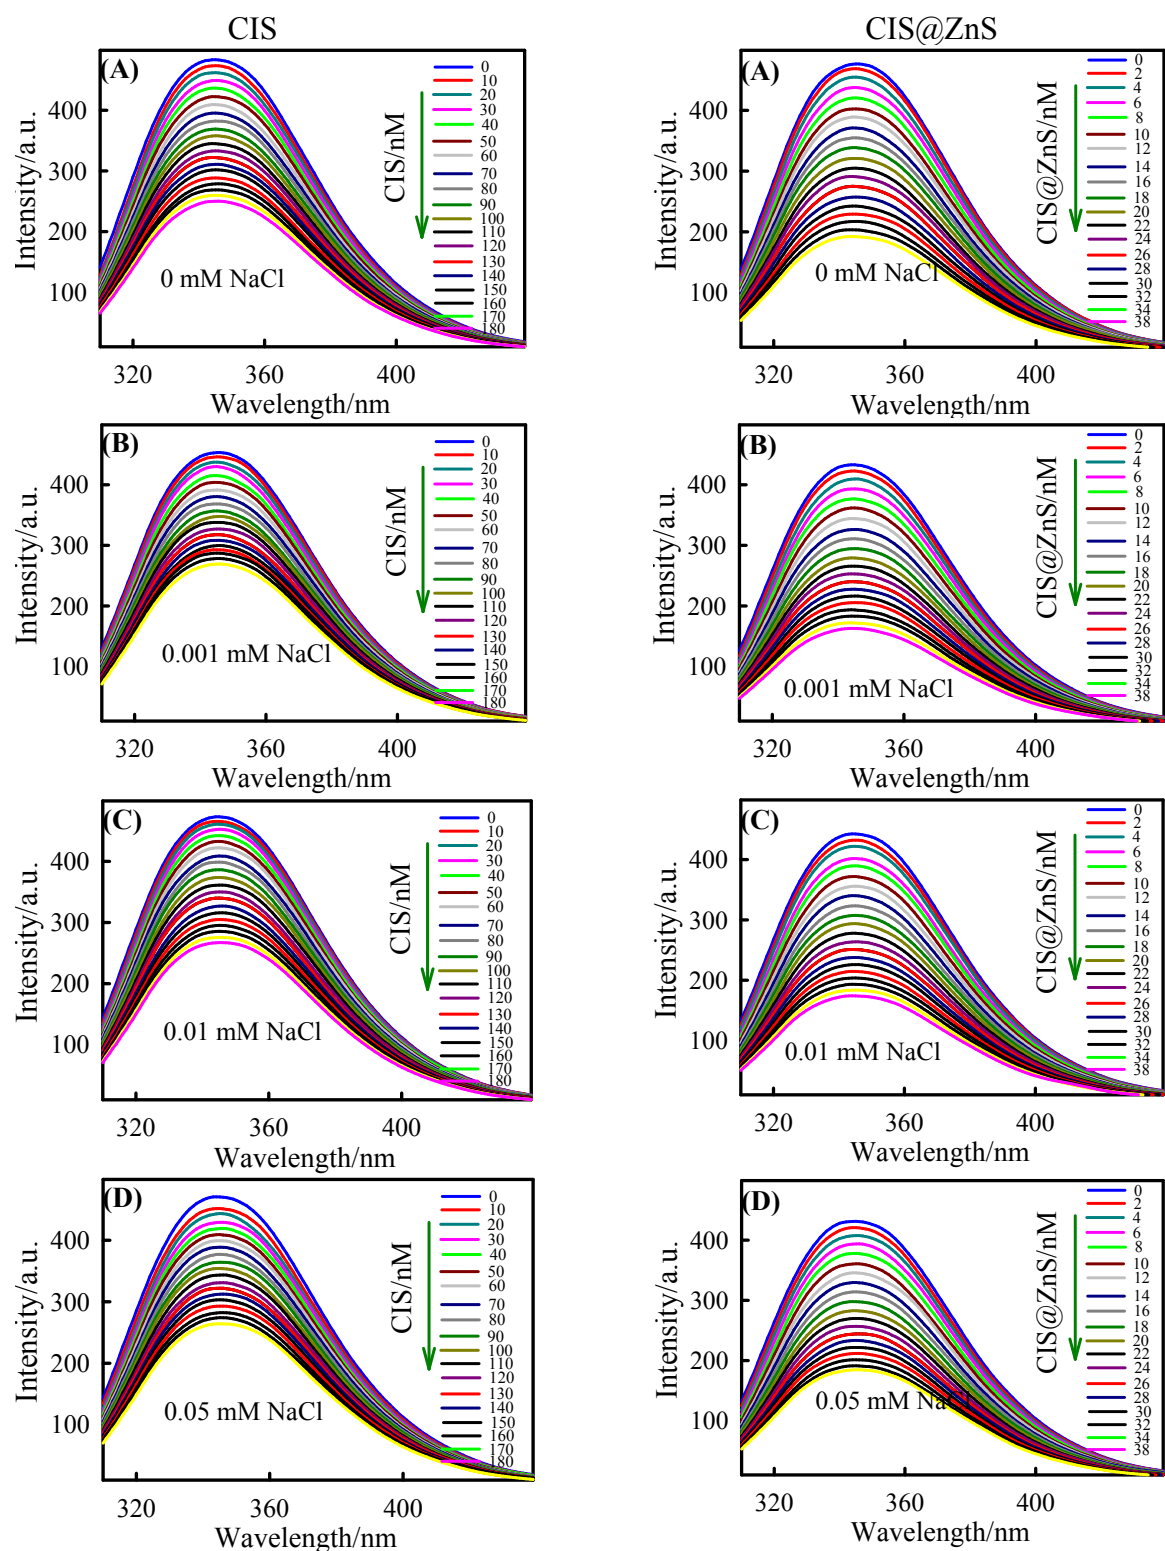

**Figure S3:** Emission spectra of lysozyme (5  $\mu\text{M}$ ) in the presence of different concentrations of CIS (left side) and CIS@ZnS (right side) QDs at 298k temperature in the presence of different concentration of salt.

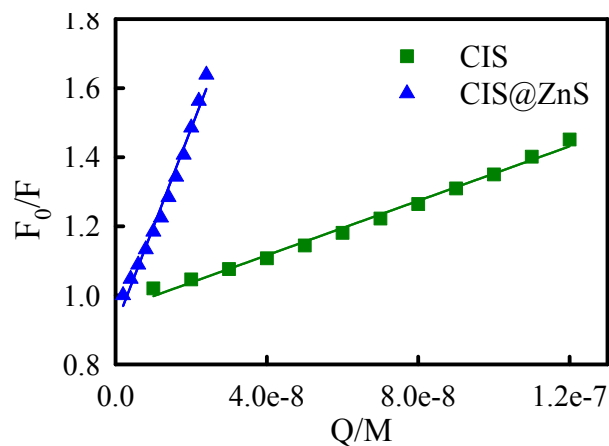

**Figure S4:** Stern–Volmer plots for quenching constant, derived from fluorescence data of lysozyme (5  $\mu\text{M}$ ) as function of concentration of CIS and CIS@ZnS core-shell QDs at 298 K in absence of salt.

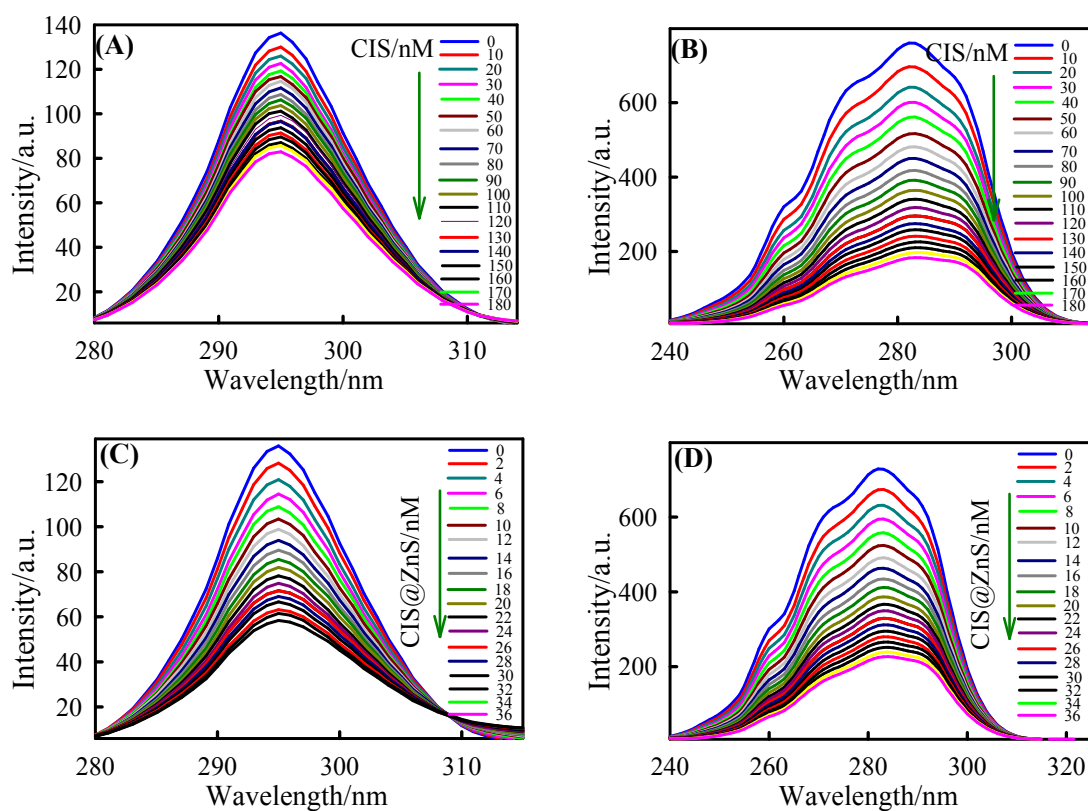

**Figure S5:** Synchronous fluorescence quenching spectra at  $\Delta\lambda=15$  nm (Tyrosine) and  $\Delta\lambda=60$  nm (Tryptophan) of Lysozyme (5  $\mu\text{M}$ ), in the absence and presence of CIS QD (10 to 180 nM) and CIS@ZnS core-shell QDs (2 to 36 nM).

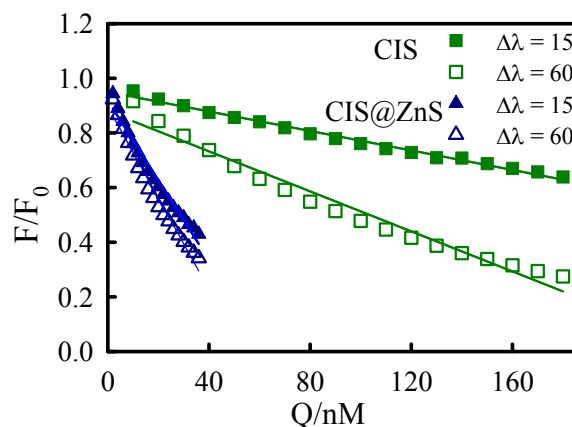

**Figure S6:** Dependence of the ratio between the Synchronous fluorescence quenching intensity as a function of CIS and CIS@ZnS core-shell QD concentration. Note the more slope in case of  $\Delta\lambda = 60$  nm indicates the quenching is mostly due to tryptophan residues of proteins.

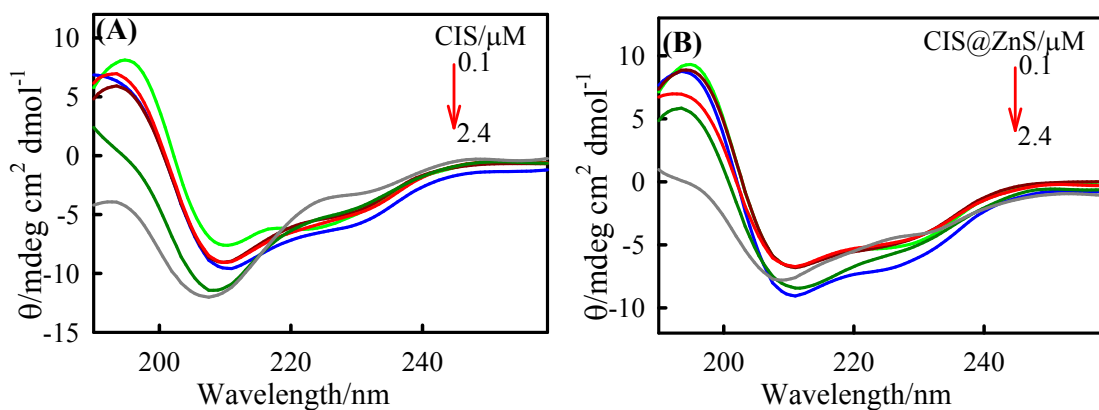

**Figure S7:** Dependence of secondary structure (helicity) of lysozyme ( $5 \mu\text{M}$ ) on (A) CIS and (B) CIS@ZnS core-shell QDs with concentration ( $0, 0.1, 0.6, 1.2, 1.8$  and  $2.4 \mu\text{M}$ ) at  $298 \text{ K}$ . Note the gain of secondary structure due to complexation of proteins with QDs.

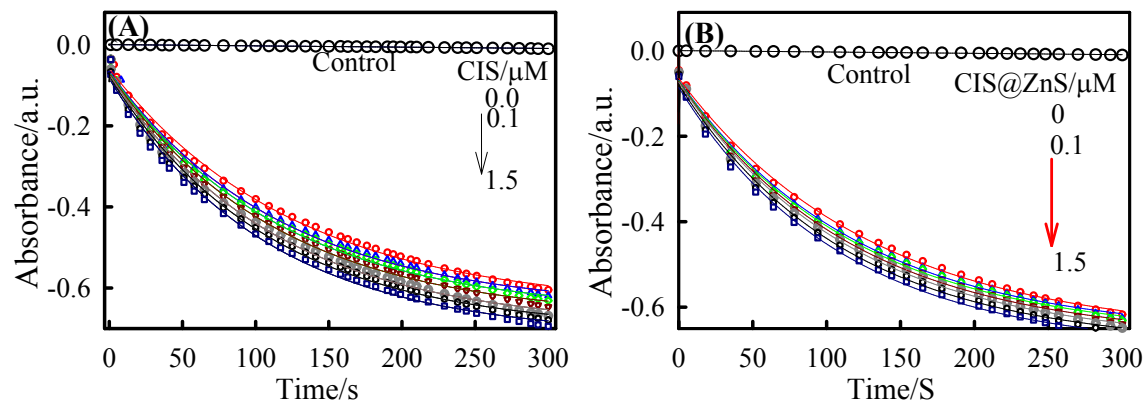

**Figure S8:** Enhancement in the enzymatic activity of lysozyme (5 μM) in presence of different concentrations of **(A)** CIS QDs (0, 0.1, 0.3, 0.6, 0.9, 1.2, 1.5 μM). **(B)** CIS@ZnS core-shell QDs (0, 0.1, 0.3, 0.6, 0.9, 1.2, 1.5 μM).
